# Supplementary material for: Biological synthesis of free-standing uniformed goethite nanowires by Shewanella sp. HN-41
Source: Royal Society of Chemistry journal article supplement (doi:10.1039/c2ta00466f), 2012-11-20
Supplement: c2ta00466f.pdf [file c2ta00466f.pdf]

## Supplementary Information

### Biological Synthesis of Free-standing Uniformed Goethite

#### Nanowires by *Shewanella* sp. HN-41

Shenghua Jiang<sup>a</sup>, Min-Gyu Kim<sup>\*b</sup>, In Young Kim<sup>c</sup>, Seong-Ju Hwang<sup>c</sup> and Hor-Gil Hur<sup>\*a</sup>

From the TGA, a slight weight loss is observed around 100°C, which is attributed to thermal removal of H<sub>2</sub>O adsorbed on the surface of nanowire goethite. The large weight loss between 180°C and 300°C is due to thermal decomposition of goethite, alpha-FeOOH, to iron oxide such as alpha-Fe<sub>2</sub>O<sub>3</sub> (it is because the TGA curves were measured in air flow-rate of 100ml/min) (*Physica B* 390, 23, 2007). The Brunauer-Emmett-Teller (BET) data have been obtained using N<sub>2</sub> gas at 77K after degassing at 150°C for 3 hours. Compared to BET specific surface area of ~34.7 m<sup>2</sup>/g for the chemically-synthesized nanorod goethite, the biogenic nanowire presents much higher BET surface of 82.8 m<sup>2</sup>/g, showing the isotherm profile type-III without any substantial hysteresis loop. (In a comparison, nanorod goethite was chemically synthesized through reaction of Fe(NO<sub>3</sub>)<sub>3</sub> and KOH in solution and its TEM image was present Fig. S1.)

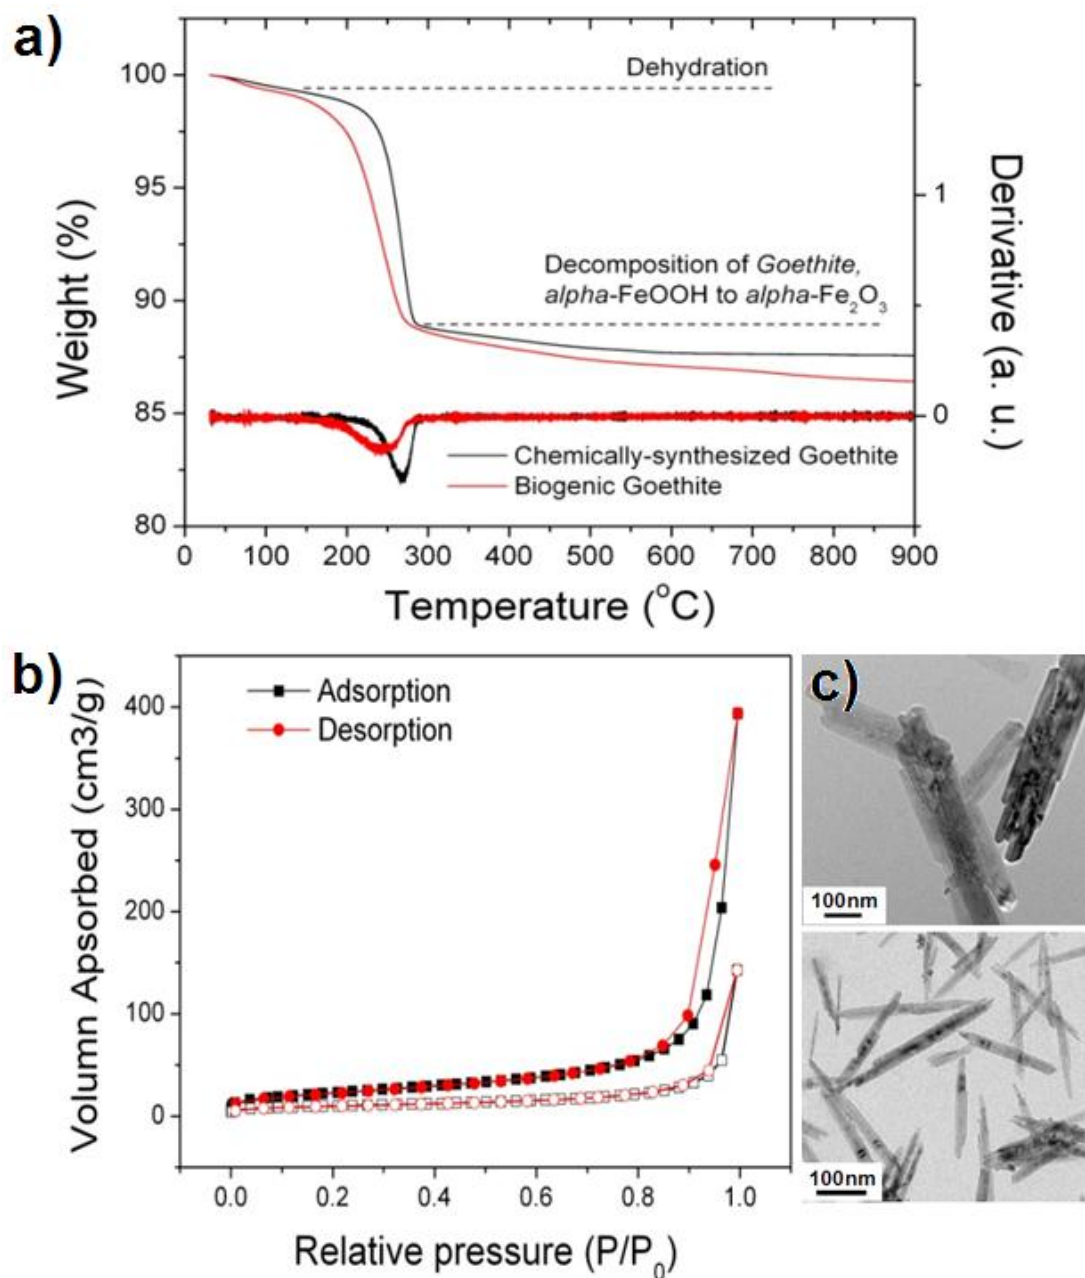

Fig. S1. Thermogravimetric analysis (TGA) (biogenic goethite : red line, chemical goethite : black line) (a), N<sub>2</sub> adsorption-desorption isotherm profiles of biogenic nanowire goethite recorded at 77K (biogenic goethite : filled, chemical goethite : open) (b), and TEM image of chemically-synthesized nanorod goethite (c).
